# Supplementary material
Source: publisher figshare collection journal article supplement (https://karger.figshare.com/articles/dataset/_/19732384)
Supplement: Supplementary file 4 [file 1]

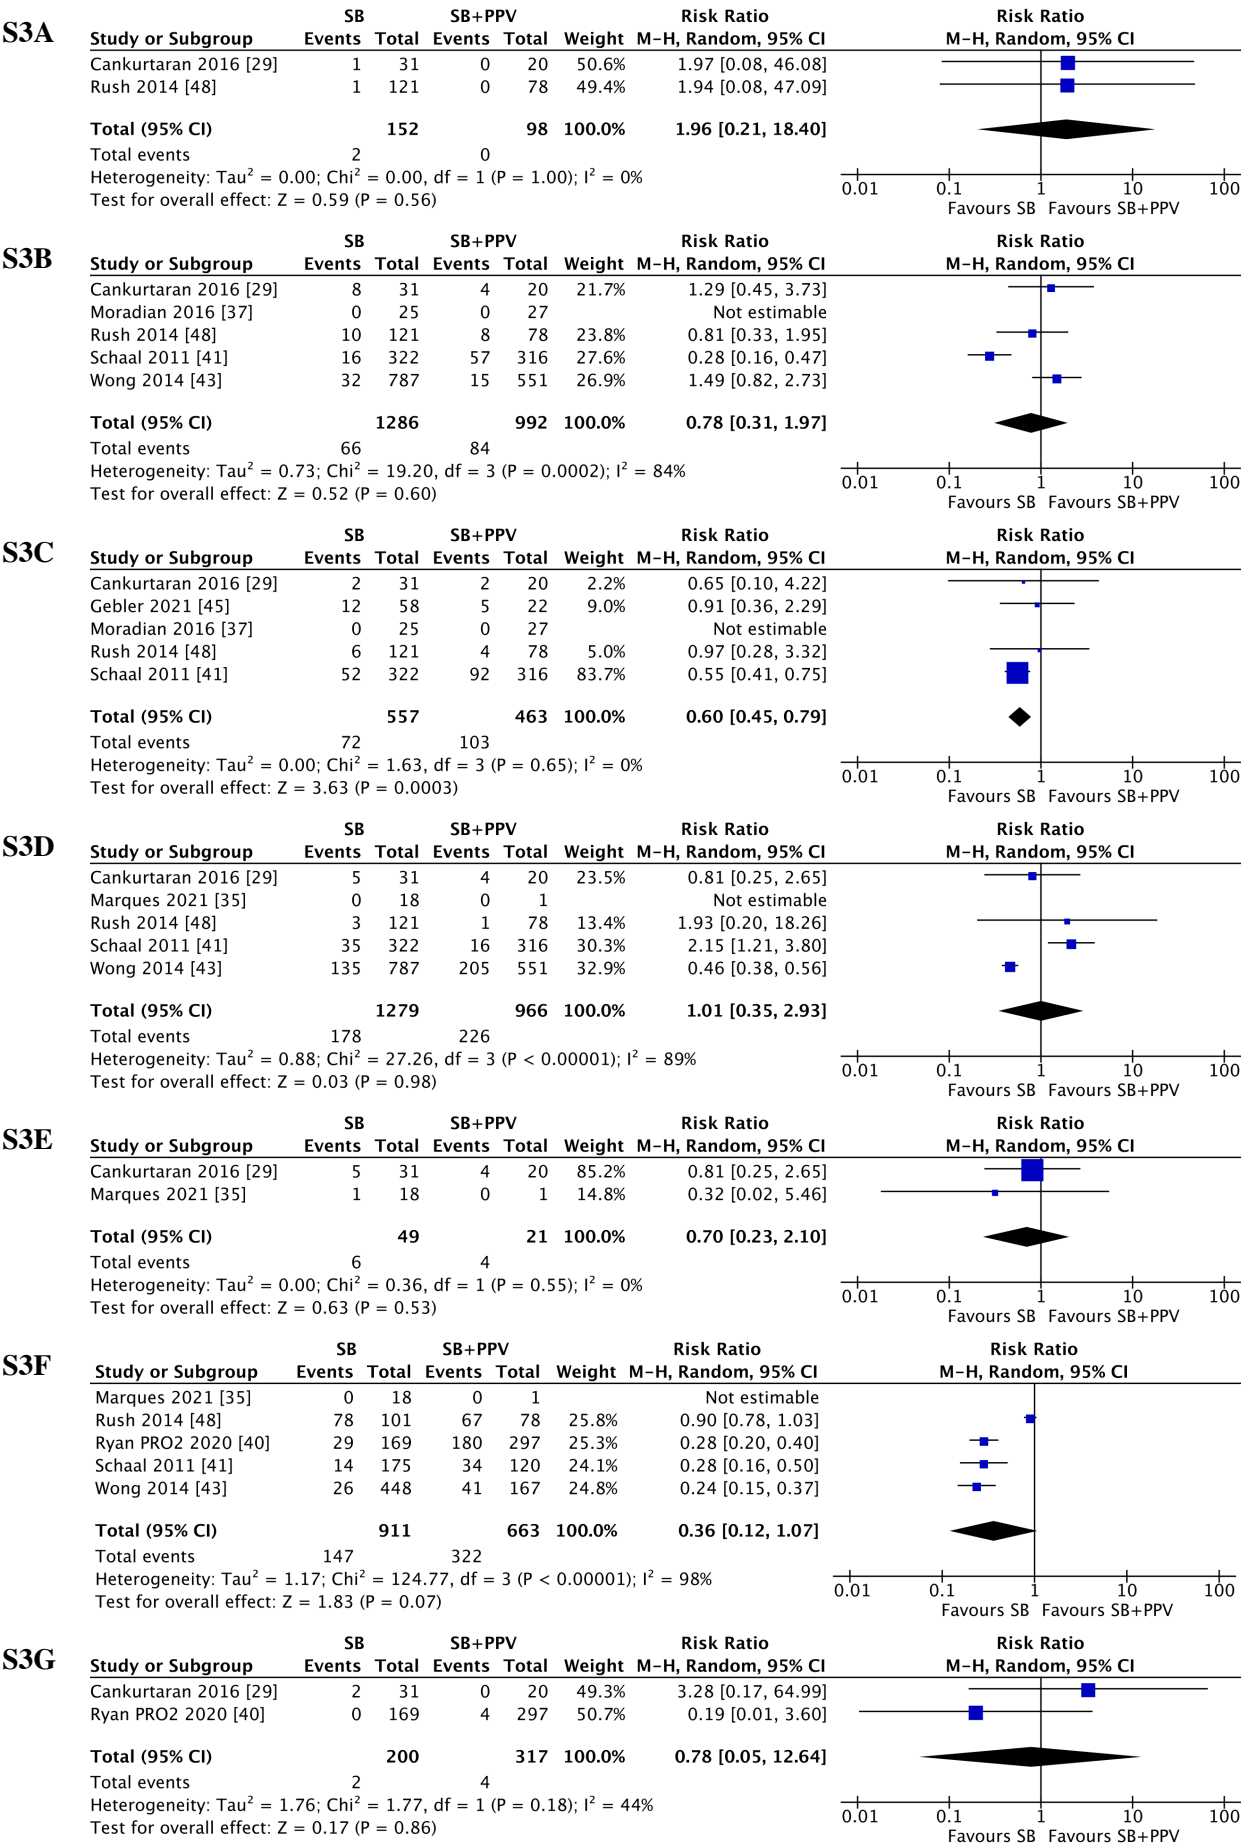

**Figure S3.** Forest plots of the subgroup safety analyses of SB versus SB+PPV for the surgical management of RRD based on studies published on or after 2010 illustrating the incidence of (A) macular hole; (B) epiretinal membrane/macular pucker; (C) macular edema; (D) elevated IOP or ocular hypertension; (E) proliferative vitreoretinopathy development or progression; (F) cataract development or progression; (G) diplopia, strabismus, and other extraocular muscle dysfunction. CI = confidence interval; SB = scleral buckling; SB+PPV = combined scleral buckling and pars plana vitrectomy; SD = standard deviation
