# Supplementary material
Source: publisher figshare collection journal article supplement (https://karger.figshare.com/articles/dataset/_/19732384)
Supplement: Supplementary file 6 [file 1]

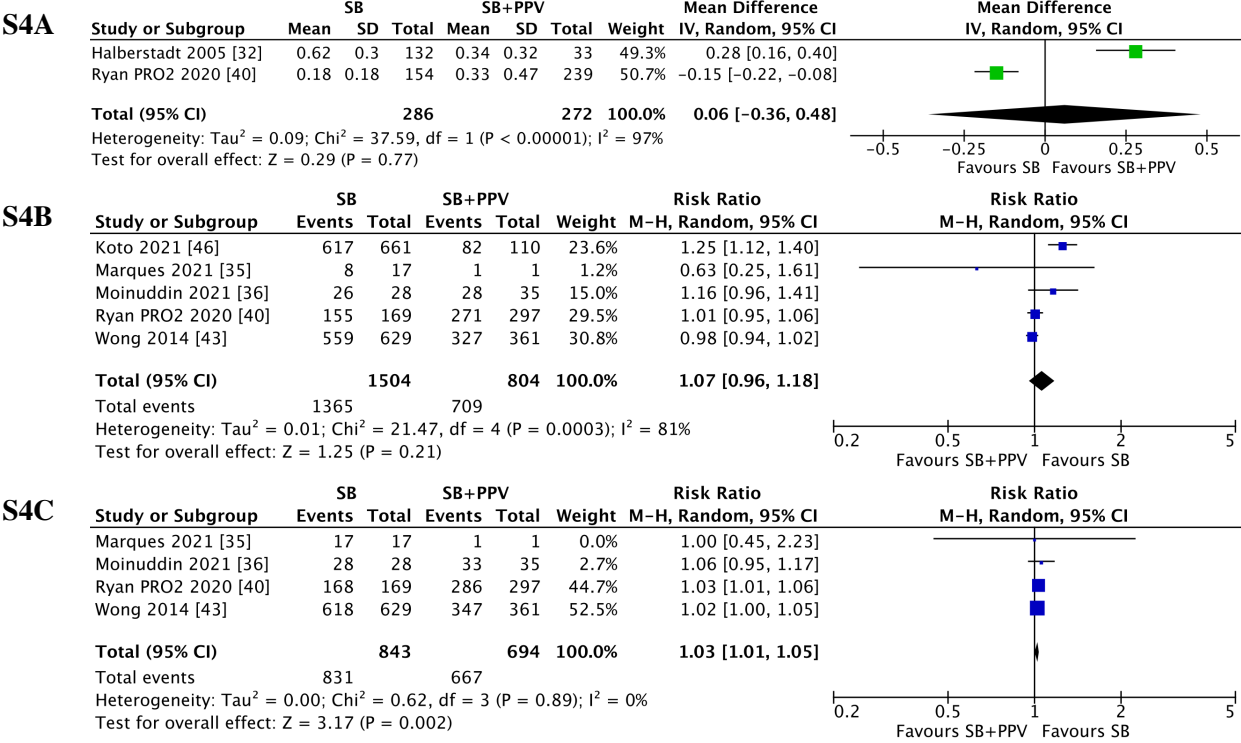

**Figure S4.** Forest plots of a subgroup efficacy analyses of SB versus SB+PPV for the surgical management of RRD based on eyes with a phakic lens status illustrating the **(A)** BCVA at last follow-up; **(B)** primary reattachment rate; and **(C)** final reattachment rate. CI = confidence interval; BCVA = corrected distance visual acuity; SB = scleral buckling; SB+PPV = combined scleral buckling and pars plana vitrectomy; SD = standard deviation
