# Supplementary material
Source: publisher figshare collection journal article supplement (https://karger.figshare.com/articles/dataset/_/19732384)
Supplement: Supplementary file 8 [file 1]

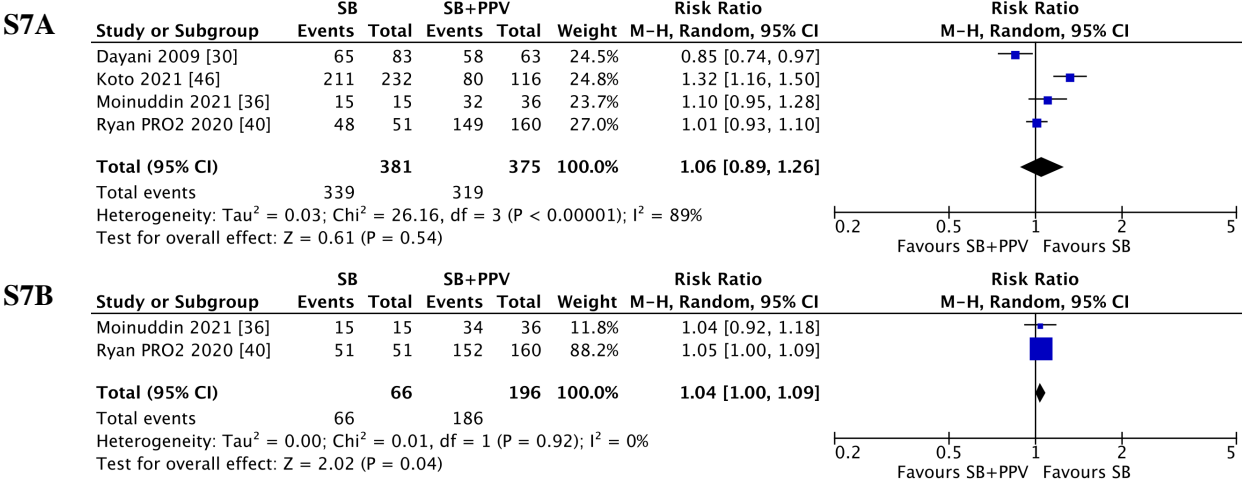

**Figure S7.** Forest plots of a subgroup efficacy analyses of SB versus SB+PPV for the surgical management of RRD based on eyes with a macula off attachment status illustrating the **(A)** primary reattachment rate; and **(B)** final reattachment rate. CI = confidence interval; SB = scleral buckling; SB+PPV = combined scleral buckling and pars plana vitrectomy; SD = standard deviation
